# Supplementary material for: Room-Temperature Solid-State UV Cross-Linkable Vitrimer-like Polymers for Additive Manufacturing
Source: MDPI journal article supplement (doi:10.3390/polym14112203), 2022-05-29
Supplement: s1 [file s1]

## Supplementary

### **Room temperature solid-state UV cross-linkable vitrimer-like polymers for additive manufacturing**

Jian Chen<sup>†</sup>, Ya Wen<sup>†</sup>, Lingyi Zeng<sup>†</sup>, Xinchun Wang<sup>†</sup>, Hongmei Chen<sup>\*,†</sup>, Wei Min Huang<sup>\*,‡</sup>, Yuefeng Bai<sup>†</sup>, Wenhao Yu<sup>†</sup>, Keqing Zhao<sup>†</sup>, and Ping Hu<sup>\*,†</sup>

<sup>†</sup> College of Chemistry and Materials Science, Sichuan Normal University, Chengdu 610066, China.

<sup>‡</sup> School of Mechanical and Aerospace Engineering, Nanyang Technological University, Singapore 639798, Singapore.

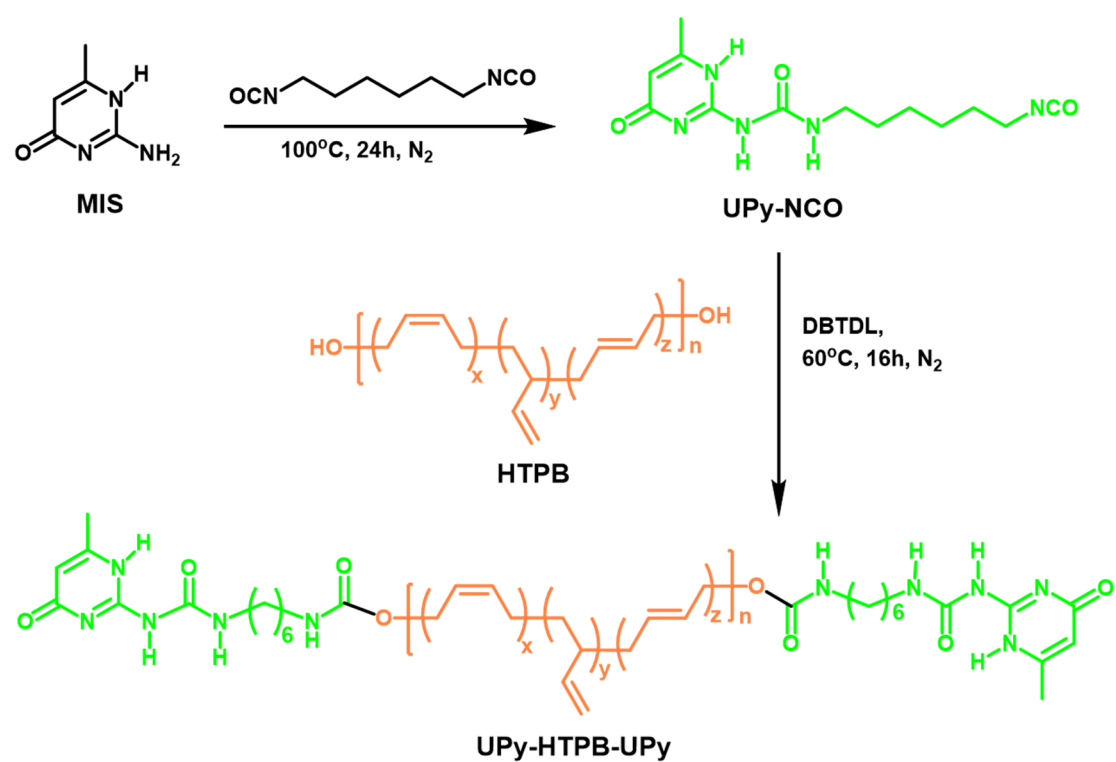

Scheme S1. Synthetic route of UPy-HTPB-UPy.

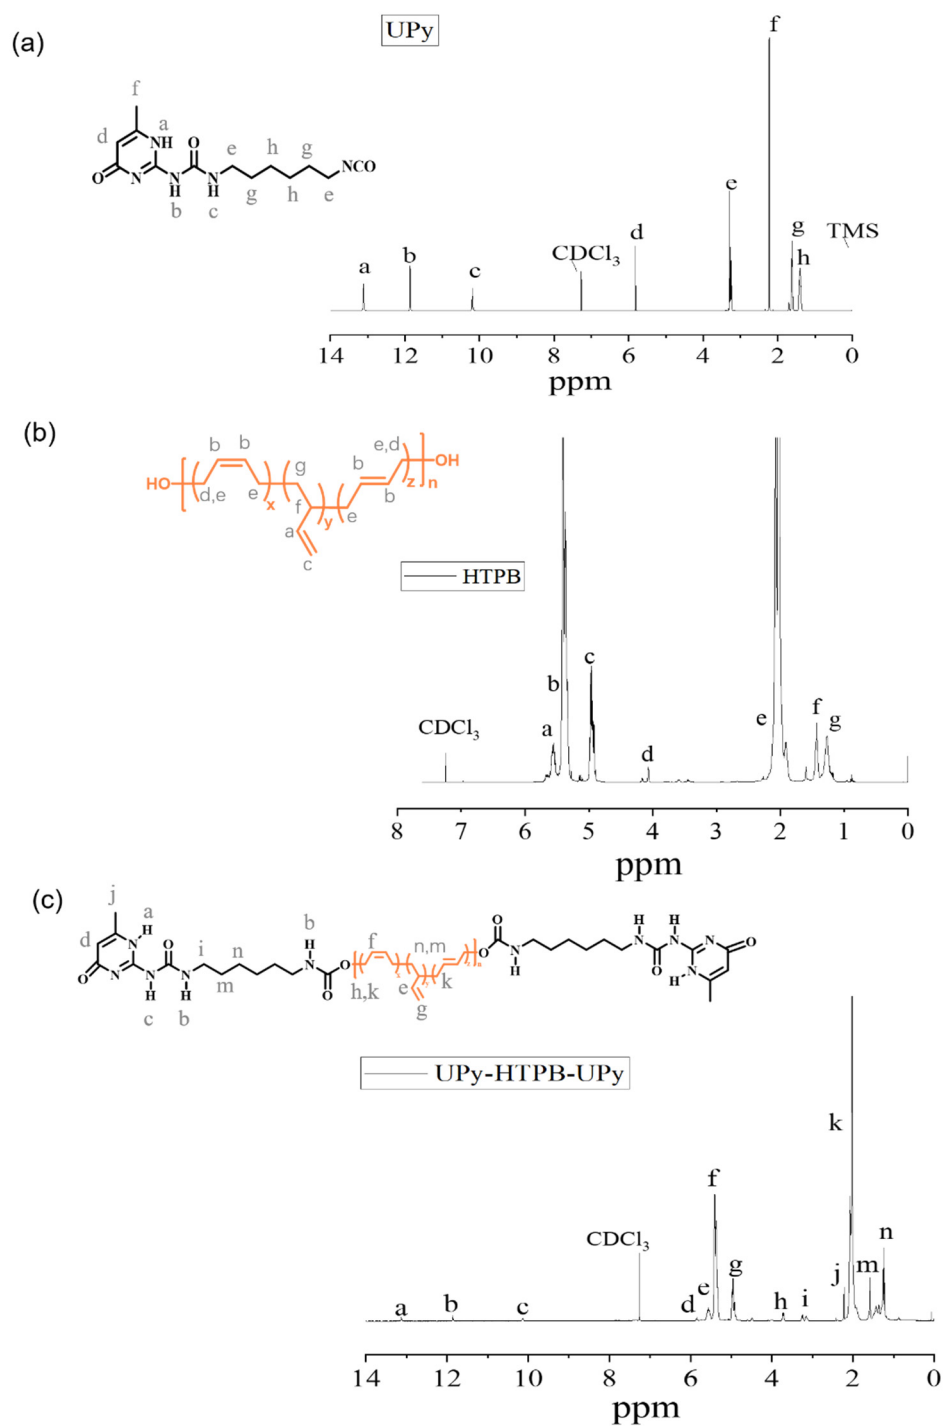

Figure S1.  $^1\text{H}$  NMR results of (a) UPy-NCO, (b) HTPB, and (c) UPy-HTPB-UPy confirm that UPy unites are connected to HTPB.

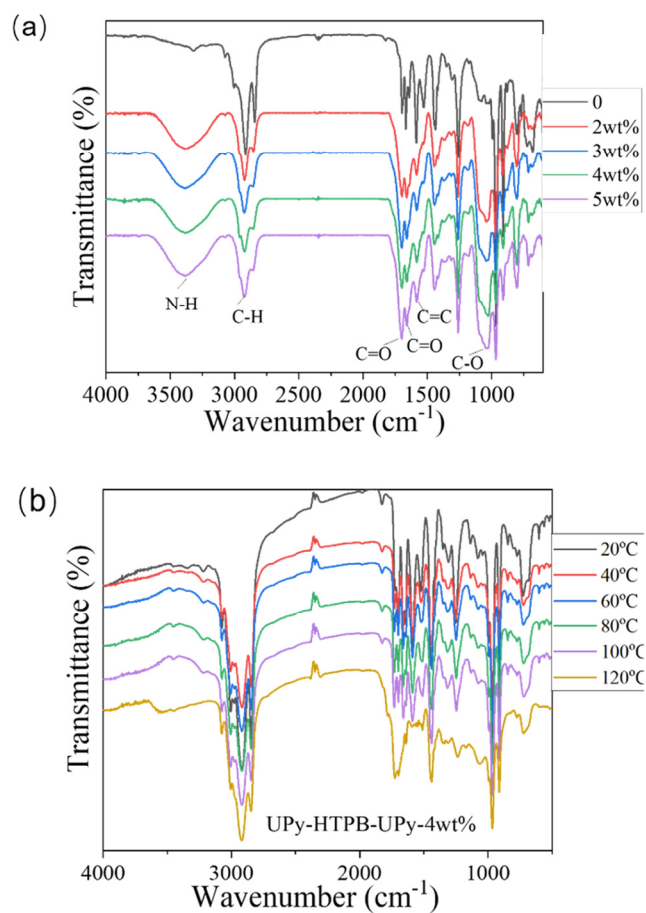

Figure S2. (a) FTIR spectra of C-UPy-HTPB-UPy-*n*wt% films with different weight content of photo initiator (*n* = 0%, 2% 3%, 4% and 5%); (b) FTIR spectra of UPy-HTPB-UPy-4wt% at different temperatures.

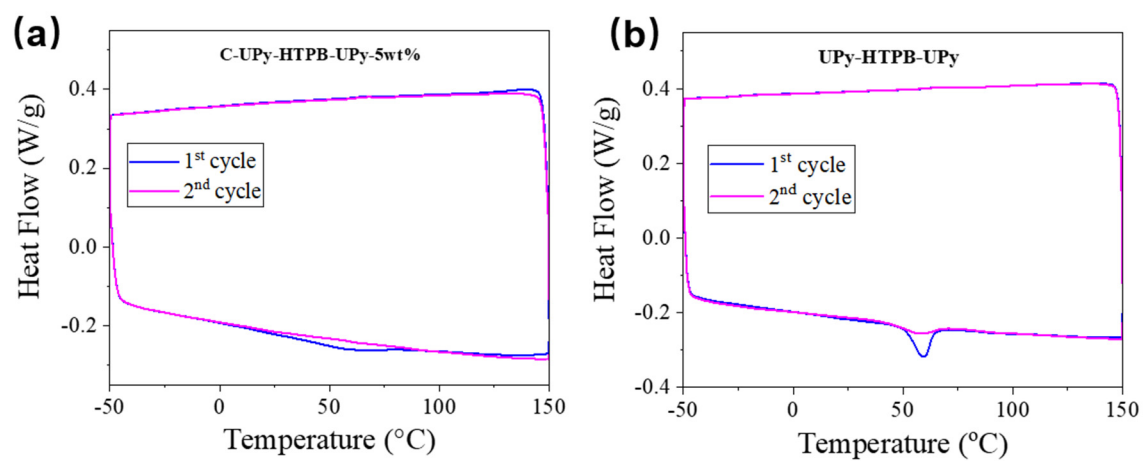

Figure S3. DSC results of (a) C-UPy-HTPB-UPy-5wt% and (b) UPy-HTPB-UPy.

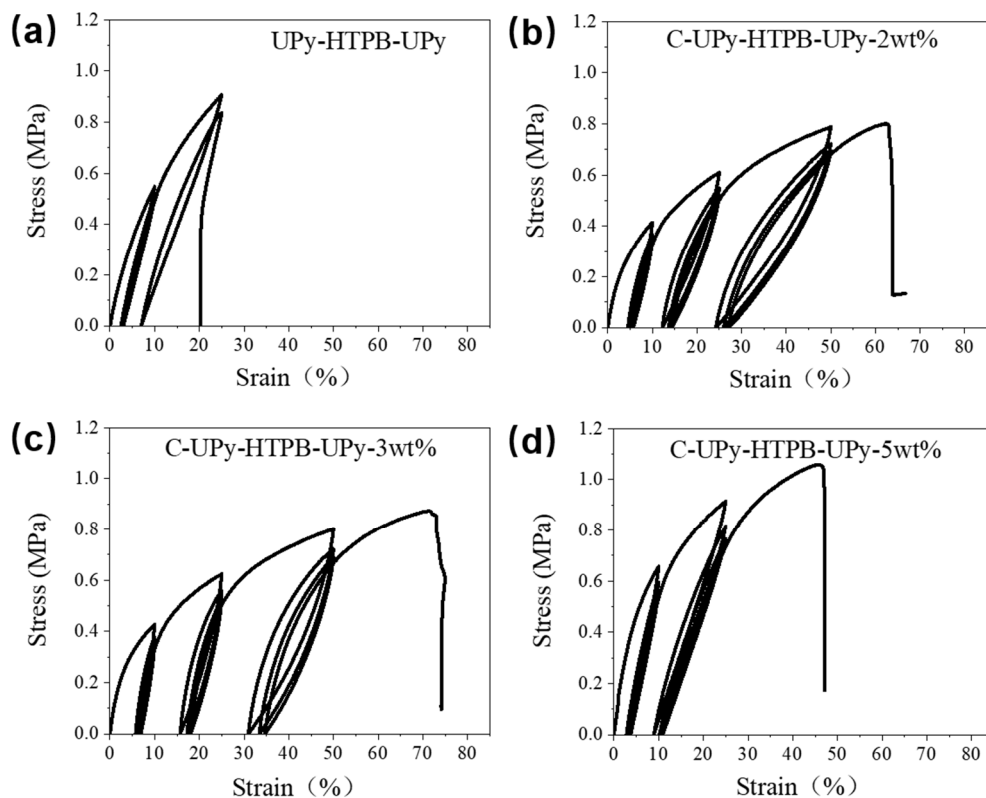

Figure S4. Cyclic uniaxial tension results of (a) UPy-HTPB-UPy and (b)-(e) C-UPy-HTPB-UPy-*n*wt% to 10%, 20%, 50%, and finally 70% strain (three cycles at each prescribed strain) (all samples were cross-linked under 25 W 365 nm UV light for 2 h).

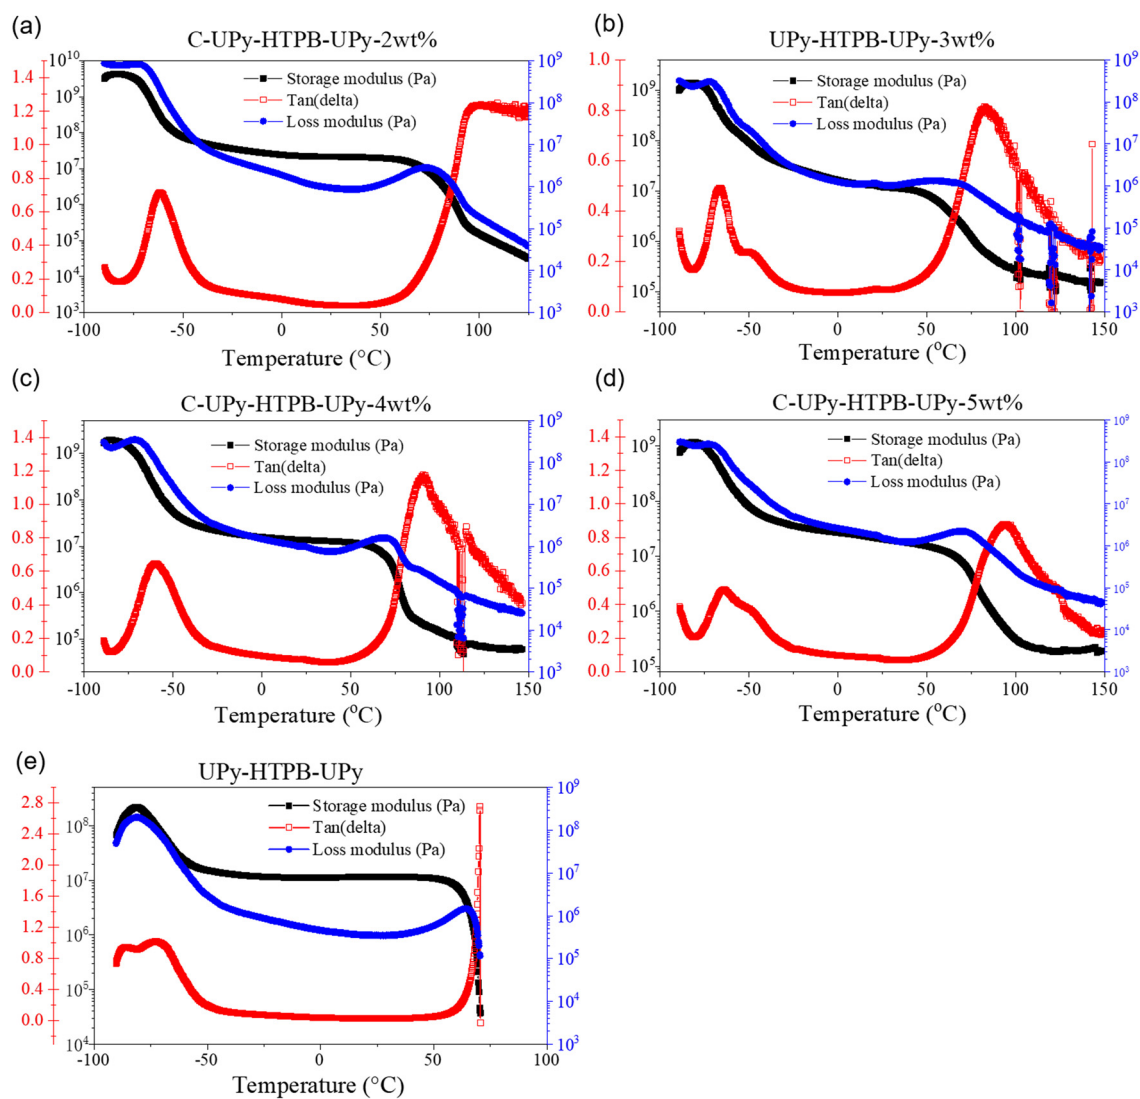

Figure S5. DMA results of (a)~(d) C-UPy-HTPB-UPy- $n$ wt% ( $n=2,3,4,5$ ) and (e) UPy-HTPB-UPy.

Table S1. Uniaxial tension to fracture of C-UPy-HTPB-UPy- $n\%$ .

| $n$                                  | 2         | 3         | 4         | 5         |
|--------------------------------------|-----------|-----------|-----------|-----------|
| Fracture stress<br>$\sigma$ (MPa)    | 0.84±0.05 | 0.98±0.09 | 1.05±0.02 | 1.15±0.02 |
| Fracture strain<br>$\varepsilon$ (%) | 56.7±4.2  | 67.9±2.7  | 78.1±6.96 | 50.1±3.0  |

Table S2. Shape fixation ratio ( $R_f$ ) and shape recovery ratio ( $R_r$ ) of C-UPy-HTPB-UPy- $n\%$  in three shape memory cycles carried out by DMA.

| $n$       | 2wt%            |                 |                 | 3wt%            |                 |                 | 4wt%            |                 |                 | 5wt%            |                 |                 |
|-----------|-----------------|-----------------|-----------------|-----------------|-----------------|-----------------|-----------------|-----------------|-----------------|-----------------|-----------------|-----------------|
|           | 1 <sup>st</sup> | 2 <sup>nd</sup> | 3 <sup>rd</sup> | 1 <sup>st</sup> | 2 <sup>nd</sup> | 3 <sup>rd</sup> | 1 <sup>st</sup> | 2 <sup>nd</sup> | 3 <sup>rd</sup> | 1 <sup>st</sup> | 2 <sup>nd</sup> | 3 <sup>rd</sup> |
| $R_f$ (%) | 99              | 99              | 99              | 95              | 87              | 77              | 89              | 83              | 82              | 81              | 73              | 82              |
| $R_r$ (%) | 52              | 71              | 50              | 50              | 70              | 65              | 74              | 92              | 92              | 76              | 92              | 94              |



Movie S1. Demonstration of UV cross-linking in solid state at room temperature.

<https://www.youtube.com/watch?v=0r3455sb8Lg>
